# Supplementary material
Source: Springer Nature journal article supplement (https://www.springermedizin.de/resource/supplementary/12885_2010_2512_MOESM1_ESM.pdf/9461724)
Supplement: MOESM1 [file 9461724]

# Homeopathy (N = 259)

(Informed consent)

# Conventional Care (N = 380)

N = 250 (96%)  
missing data: N = 9 (4%)

**T0**

N = 310 (82%)  
missing data: N = 70 (18%)

N = 179 (69%)  
died: N = 13 (5%)  
m.d.: N = 67 (26%)

**T1  
(3 months)**

N = 261 (68%)  
died: N = 10 (3%)  
m.d.: N = 109 (29%)

N = 165 (64%)  
died: N = 36 (14%)  
m.d.: N = 58 (22%)

**T2  
(6 months)**

N = 275 (72%)  
died: N = 35 (9%)  
m.d.: N = 70 (18%)

N = 153 (59%)  
died: N = 49 (19%)  
m.d.: N = 57 (22%)

**T3  
(9 months)**

N = 234 (62%)  
died: N = 55 (14%)  
m.d.: N = 91 (24%)

N = 144 (56%)  
died: N = 59 (23%)  
m.d.: N = 56 (21%)

**T4  
(12 months)**

N = 217 (57%)  
died: N = 76 (20%)  
m.d.: N = 87 (23%)
